# Supplementary material
Source: Research Square preprint supplement (doi:10.21203/rs.3.rs-8601542/v2)
Supplement: Supplementary file 1 [file 1fb4b9a3180eb6a237b08df4.docx]

**Table 4.** PCA variable loadings for the first two components. PC1: The first principal component, PC2: The second principal component

| **Karakter (Değişken)** | **PC 1** | **PC 2** |
| --- | --- | --- |
| **Abaxial epidermis cell diameter** | **0.92267** | 0.14442 |
| **Leaf collenchyma** | -0.15767 | **0.98627** |
| **Stem cuticle** | -0.43901 | 0.75801 |
| **Stem collenchyma cell diameter** | 0.35089 | 0.05962 |
| **Stem type 8 glandular hair** | 0.11843 | 0.34015 |
| **Leaf upper cuticle** | -0.02132 | -0.04589 |
| **Leaf mesophyll thickness** | -0.00910 | -0.01283 |
| **Stem epidermal cell diameter** | -0.00011 | 0.00012 |
| **Pith parenchyma** | -0.00013 | -0.00124 |
| **Leaf adaxial epidermis cell diam.** | -0.00025 | -0.00066 |
| **Leaf trachea diameter** | -0.000504 | -0.0008502 |
