# Supplementary material
Source: Research Square preprint supplement (doi:10.21203/rs.3.rs-8601542/v2)
Supplement: Supplementary file 2 [file 71d781b65e6b8d2f93f90496.docx]

Table 1. The collections data of the *Verbascum* taxa

| **Taxon** | **Habitat** | **Locality** | **Herbarium Id**  **(ISTE Number)** | **Endemism** |
| --- | --- | --- | --- | --- |
| ***V. bugulifolium* Lam.** | *Quercus scrub,*  *Pinus* forest | A2(E) İstanbul: Çatalca-Subaşı, open forests, 18.05.2022, *G. Ecevit Genç, İ. Genç* | 118477 | - |
| A2(A) İstanbul: Sultanbeyli, Teferrüc mountain, 121 m, *Pinus* forest clearings, 10.06.2021, *M. Yılmaz* | 118509 |
| A2(E) İstanbul:Çatalca-Kestanelik, open forests, 250 m, 06.06.2021, *M. Yılmaz, M.Y. Yılmaz* | 118502 |
| ***V. blattaria* L.** | Meadows,  *Pinus* forest | A2(A) İstanbul: Beykoz-Anadolu Feneri, field edges, 21 m, 3.06.2022, *M. Yılmaz, M.Y. Yılmaz* | 118448 | - |
| A2(A) İstanbul: Şile roadside, forest clearing near Çengilli village, 151 m, 30.06.2022, *M.Yılmaz, E.Ortaç* | 118400 |
| A2(A) İstanbul:Sancaktepe-Samandıra roadsides, 121 m, 01.08.2022, *M. Yılmaz* | 118484 |
| ***V. xanthophoeniceum*** | *Pinus* forest,  *Quercus* scrubs,  Pastures | A2(A) İstanbul: Pendik, Ballıca village, forest clearing roadside, 84 m, 4.05.2022, *M. Yılmaz, M.Y. Yılmaz* | 118441 | - |
| A2(E) İstanbul:Çatalca, roadsides between Karaburun and Durusu, 19.05.2022, *G.Ecevit Genç, İ.Genç* | 118436 |
| A2(E) İstanbul: Çatalca, Yeniköy-Çeşme, 19.05.2022, *G.Ecevit Genç, İ.Genç* | 118435 |
| A2(E) İstanbul:Çatalca-Subaşı recreation area under the forest 65 m, 6.06.2021, *M. Yılmaz, M.Y. Yılmaz* | 118438 |
| ***V. ovalifolium***  **subsp. *ovalifolium*** | Meadows,  *Pinus* forest | A2(E) İstanbul: Çatalca, Ormanlı village, roadsides, 13 m, 1.07.2022, *M. Yılmaz, G. Ecevit Genç, Z.B. Erarslan* | 118483 | - |
| A2(E) İstanbul: Çatalca, Akalan village, roadsides, 163 m, 1.07.2022, *M. Yılmaz, G. Ecevit Genç, Z.B. Erarslan* | 118393 |
| A2(A) İstanbul: **S**ultanbeyli-Teferrüc mountain, 94 m, 10.05.2022, *M. Yılmaz, M.Y. Yılmaz* | 118476 |
| ***V ovalifolium***  **subsp. *thracicum* (Velen.) Murb.** | Meadows,  *Pinus* forest | A2(E) İstanbul: Akalan village 167 m, 01.07.2022, *M.* *Yılmaz, G. Ecevit Genç, Z.B. Erarslan* | 118459 | - |
| ***V. bombyciferum* Boiss.** | *Quercus scrub,*  *Pinus* forest | A2(E) İstanbul: Sarıyer, Uskumruköy, *M.* *Yılmaz, G. Ecevit Genç, Z.B. Erarslan* | 11841 | + |
| ***V. lagurus* Fisch. & C.A.Mey.** | *Pinus* forest,  *Quercus* scrub,  waste places | A2(A) İstanbul: Şile-Ömerli, roadsides, 168 m 29.05.2022, *M. Yılmaz, Z.B. Erarslan* | 118406 | - |
| A2(E) İstanbul:Sarıyer, Uskumruköy, Kilyos roadsides, 105 m, 24.05.2022, *M. Yılmaz, G. Ecevit Genç, Z.B. Erarslan* | 118402 |
| A2(A) İstanbul:Beykoz, Yuşa Hill roadsides, 110 m, 19.05.2022, *M. Yılmaz, M.Y. Yılmaz* | 118405 |
| A2(A) İstanbul:Beykoz, Anadolu Kavağı, *Pinus* forest, 142 m, 19.05.2022, *M. Yılmaz, M.Y. Yılmaz* | 118408 |
| A2(A) İstanbul:Tuzla Akfırat , İstanbul Park Formula Racing Square roadsides, 136 m, 15.05.2022, *M. Yılmaz* | 118410 |
| ***V. phlomoides* L.** | Open woodland | A2(E) İstanbul: Eyüpsultan, 81 m, 1.07.2022, *M. Yılmaz, G. Ecevit Genç, Z.B. Erarslan* | 118461 | - |
| A2(A) İstanbul:Şile-Değirmençayırı village field edge, 225 m, 27.06.2021, *M. Yılmaz, E. Yurt* | 118519 |
| ***V. georgicum* Benth.** | Water channels | A2(E) İstanbul: Arnavutköy, Haraççı, streamside, 57 m, 5.07.2023 *M.Yılmaz, A.Güneş* | 118623 | - |
| ***V. densiflorum* Bertol.** | Dry slopes | A2(A) İstanbul: Beykoz, Anadolu Kavağı *M. Yılmaz, M.Y. Yılmaz* | 118453 | - |
| ***V. thapsus* L.** | *Pinus* forests, open woodland | A2(A) İstanbul: Beykoz, Yuşa Hill, roadside, 119 m, 19.05.2022, *M. Yılmaz, M.Y. Yılmaz* | 118417 | - |
| A2(A) İstanbul: Sultanbeyli, forest clearings, roadside, 151 m, 16.06.2022, *M. Yılmaz, M.Y. Yılmaz* | 118454 |
| A2(E) İstanbul:Çatalca- Aydınlar village, roadside,18.06.2021, *G.Ecevit Genç, İ.Genç* | 118420 |
| A2(A) İstanbul: Şile-Değirmençayırı village, field edge, 225 m, 27.06.2021, *M. Yılmaz, E. Yurt* | 118517 |
| ***V. sinuatum* var.**  ***sinuatum*** | Coastal sands, waste places | A2(E) İstanbul: Küçükçekmece-Çatalca, roadside, 1.07.2022, *M. Yılmaz, G. Ecevit Genç, Z.B. Erarslan* | 118388 | - |
| A2(A) İstanbul: Şile-Darlık village, roadside, 244 m, 17.06.2022, *M. Yılmaz, S. Ortaç* | 118389 |
| A2(A) İstanbul: Beykoz-Riva coastal sands, 09.08.2022, *M. Yılmaz, M.Y. Yılmaz* | 118390 |
| A2(E) İstanbul: İstanbul-Çatalca Soğuksu, 1.07.2022, *M. Yılmaz, G. Ecevit Genç, Z.B. Erarslan* | 118485 |
| A2(A) İstanbul:Pendik- Kurnaköy roadside, 21 m, 28.07.2021, *M. Yılmaz, E. Ortaç* | 118516 |
| ***V. sinuatum* var*.***  ***adenosepalum* Murb.** | Waste places | A2(A) İstanbul: Pendik-Göçbeyli Village, roadside, 17.06.2022, *M. Yılmaz* | 118413 |  |
| A2(A) İstanbul:Beykoz-Riva, roadside, 19 m, 09.08.2022, *M. Yılmaz, M.Y. Yılmaz* | 118464 |
| ***V. bithynicum* Boiss.** | Coniferous and deciduous forests, streamside | A2(A) İstanbul: Şile-Darlık village, forest clearings, 260 m, 17.06.2022, *M. Yılmaz, S. Ortaç* | 118782 | + |
| A2(A) İstanbul: Tuzla, *Pinus* forest clearings, 151 m, 28.06.2021, *M. Yılmaz* | 118513 |
| A2(A) İstanbul: Şile-Ağva, streamside, 9 m, 27.06.2021, *M. Yılmaz* | 118512 |
| ***V. gnaphalodes* M.Bieb.** | *Quercus* and *Corylus* scrub | A2(A) İstanbul: Şile-Değirmençayırı village, field edge, 170 m, 27.06.2021, *M. Yılmaz* | 118505 | - |
| ***V. degenii* Halácsy** | Coastal sands and dunes | A2(A) İstanbul: Beykoz-Riva roadsides, 18 m, 09.08.2022, *M. Yılmaz, M.Y. Yılmaz* | 118492 | + |
| A2(A) İstanbul:Şile, roadside, 50 m, 29.05.2021, *M.Yılmaz, Z.B.Erarslan* | 118479 |
| A2(E) İstanbul:Sarıyer, Uskumruköy, coastal sand, 7.06.2023, *D. Oral, M. Yılmaz* | 118627 |
| A2(A) İstanbul:Şile, Kumbaba, coastal sand, 29.05.2021, *M. Yılmaz, Z.B. Erarslan* | 118504 |
| ***V. mucronatum* Lam.** | *Quercus* scrub, steppe, | A2(A) İstanbul: Şile Çengilli village roadside, 168 m, 27.06.2021, *M. Yılmaz* | 118507 | - |
| ***V. vacillans* Murb.** | Open *Pinus* forest | A2(A) İstanbul: Şile-Yeniköy roadsides, 100 m, 15.05.2022, *M. Yılmaz* | 118414 | + |
| ***V. lasianthum* Boiss. ex Benth.** | Steppe,  waste places | A2(A) İstanbul: Tuzla-Orhanlı, roadside, 125 m, 28.07.2021, *M.Yılmaz, E.Ortaç* | 118503 | - |
| ***V. speciosum* Schrad.** | Cornfields,  waste places | A2(E) İstanbul: İstanbul-Çatalca, 120 m, 1.07.2022, *M. Yılmaz, G. Ecevit Genç, Z.B. Erarslan* | 118469 | - |
| A2(A) İstanbul: Şile-Hacıllı village, 110 m, 30.06.2022, *M.Yılmaz* | 118472 |
| A2(A) İstanbul: Şile-Darlık village roadside, 234 m,  30.06.2022, *M.Yılmaz* | 118397 |
