# Supplementary material
Source: Research Square preprint supplement (doi:10.21203/rs.3.rs-8601542/v2)
Supplement: Supplementary file 3 [file 886cdc89600d187fa01f8b00.docx]

**Table 3 Leaf anatomical mesurements of *Verbascum* taxa**

| **Taxon/ Length (µm) Min.–Max. Mean ± SD** | **Leaf upper cuticle** | **Leaf adaxial epidermis cell diameter** | **Abaxial epidermis cell diameter** | **Mesophyll thickness** | **Palisade parenchyma cell diameter** | **Palisade parenchyma** | **Spongy parenchyma** | **Interveinal region** | **Xylem thickness** | **Phloem thickness** | **TraTrachea e (Çap)** | **Collenchyma** | **Parenchyma cell** | **Idioblast** |
| --- | --- | --- | --- | --- | --- | --- | --- | --- | --- | --- | --- | --- | --- | --- |
| ***V. bugulifolium*** | 3.213-7.112 5.270±1.223 | 26.907-39.257 32.837±4.823 | 8.882-18.810 13.979±4.047 | 157.113-177.813 167.771±6.489 | 25,430-51,251  39,166±9,812 | 104.738--176.831 142.553±23.708 | 177.438-202.383 189.275±6.962 | 190.086-226.055 205.677±11.902 | 40.914-77.868 63.428±12.894 | 21.863-30.904 25.248±2.541 | 3.918-7.629 5.790±1.024 | 5.108-19.563 9.712±3.716 | 11.672-21.698 17.252±3.213 | - |
| ***V. blattaria*** | 3.679-8.243 6.451±1.434 | 32.561-48.365 38.222±5.035 | 12.529-31.015 23.114±5.820 | 207.199-260.359 233.044±20.737 | 30.684-49.917 39.234±6.646 | 84.863-137.725 111.315±17.077 | 89.274-134.589 111.340±17.225 | 263.734-313.753 288.140±18.762 | 198.030-311.988 267.858±33.330 | 78.844-231.801 180.136±51.260 | 7.615-18.787 13.524±3.676 | 23.430-53.251 39.166±9.812 | 16.970-68.764 43.423±15.780 | + |
| ***V. xanthophoeniceum*** | 0 | 28.539-52.255 41.398±7.439 | 8.808-20.886 15.706±3.591 | 336.780-421.702 373.902±34.270 | 59.778-108.577 83.194±17.736 | 160.861-232.409 213.588±19.679 | 105.738--175.831 142.553±23.708 | 416.243-556.245 462.955±47.507 | 219.692-312.028 271.862±26.526 | 37.820-169.092 112.163±40.324 | 10.925-23.666 17.084±3.352 | 17.983-49.317 34.377±7.798 | 19.191-71.056 37.393±14.679 | - |
| ***V. ovalifolium* subsp. *ovalifolium*** | 15.117-33.936 25.293±6.234 | 15.608-27.965 23.581±3.813 | 23.905-83.095 50.173±22.935 | 529.695-679.9962 597.618±51.957 | 33.924-63.438 51.009±10.700 | 238.874-335.287 285.678±37.110 | 176.440-316.305 268.312±46.418 | 487.492-556.276 509.663±21.595 | 168.300-540.268 338.408±36.404 | 34.454-152.777 98.261±36.404 | 27.563-106.038 66.415±36.404 | 28.412-71.146 48.841±13.893 | 37.210-226.640 125.214±37.210 | - |
| ***V. ovalifolium* subsp. *thracicum*** | 7.828-12.738 9.536±1.475 | 20.674-47.005 32.707±8.928 | 15.425-34.671 22.790±5.997 | 251.570-297.171 270.936±18.873 | 33.015-78.090 57.644±12.734 | 119.184-166.954 143.357±12.890 | 109.865-145.345 127.245±12.347 | 290.646-396.084 333.398±32.404 | 182.703-254.910 232.593±27.225 | 118.545-154.895 137.606±11.750 | 12.632-35.011 23.318±6.649 | 16.736-45.282 29.952±10.050 | 31.817-82.612 51.070±12.714 | - |
| ***V. phlomoides*** | 3.063-7.534 5.277±1.123 | 10.748-28.315 18.797±4.989 | 17.692-50.606 32.787±9.708 | 374.767-407.306 390.332±11.804 | 17.239-36.425 28.890±5.276 | 130.361-213.153 184.269±24.507 | 119.407-186.196 156.401±22.429 | 427.856-481.824 454.952±17.501 | 183.521-374.669 296.081±59.196 | 43.932-117.546 87.269±23.131 | 9.783-19.503 13.910±2.975 | 9.846-30.060 20.056±6.109 | 17.919-53.993 39.914±10.468 | + |
| ***V. densiflorum*** | 4.728-7.342 6.106±0.827 | 19.277-39.223 29.831±5.968 | 12.190-25.149 18.195±4.125 | 207.553-257.565 236.247±18.391 | 17.816-50.707 26.543±9.520 | 105.229-166.054 133.642±18.867 | 71.155-111.304 89.690±9.536 | 241.852-294.381 274.636±19.600 | 357.976-625.635 439.292±73.922 | 155.341-346.273 259.063±68.361 | 35.548-63.634 52.065±7.565 | 5.960-28.311 14.379±5.607 | 94.803-231.457 161.604±38.589 | - |
| ***V. georgicum*** | 5.076-11.077 7.192±1.603 | 13.112-40.023 29.189±10.535 | 195.154-249.924 223.549±18.232 | 264.402-331.209 288.933±20.205 | 22.878-39.229 31.226±4.949 | 162.079±31.641 | 33.381-81.223 55.371±15.270 | 204.553-255.000 233.974±19.430 | 57.231-215.380 158.444±47.509 | 49.436-176.676 96.987±44.717 | 12.496-24.992 18.496±3.608 | 14.066-68.518 31.646±15.264 | 36.629-118.127 59.992±27.639 | - |
| ***V. thapsus*** | 6.780-12.467 8.991±1.524 | 16.446-41.140 28.511±8.286 | 7.380-27.455-17.420±6.512 | 226.785-301.403 250.701±22.206 | 41.924-79.10 57.289±10.458 | 93.909-109.180 103.187±4.181 | 79.962-129.173 102.103±18.486 | 228.389-312.458 257.024±26.188 | 156.933-243.116 203.250±26.007 | 148.578-226.488 196.995±25.651 | 12.777-29.981 18.309±4.403 | 11.583-39.341 25.093±7.222 | 39.015-82.352 57.675±15.423 | - |
| ***V. lagurus*** | 4.995-9.113 7.361±1.159 | 15.326-44.203 30.903±10.373 | 26.261-46.402 37.296±6.510 | 315.260-511.965 394.544±66.247 | 20.849-38.728 29.780±6.604 | 144.012-212.351 183.281±21.705 | 173.319-251.885 215.247±30.934 | 394.398-613.809 477.805±73.922 | 94.767-235.436 161.731±38.109 | 171.162-207.470 185.883±10.973 | 13.754-28.884 19.977±4.222 | 15.631-49.011 29.211±9.362 | 14.194-61.722 35.413±14.202 | - |
| ***V. bombyciferum*** | 5.180-10.322 7.942±1.476 | 12.414-42.521 25.565±11.259 | 10.626-35.131 20.830±8.667 | 190.360-297.836 237.834±42.038 |  | 97.318-133.387 110.654±14.318 | 86.989-156.223 120.352±24.849 | 219.199-360.868 264.429±47.536 | 120.374-195.542 157.142±25.850 | 47.607-73.420 60.206±8.262 | 17.065-49.390 27.810±9.323 | 22.352-57.326 37.863±12.180 | 25.235-74.963 41.773±14.016 | - |
| ***V. bithynicum*** | 16.369-28.442 21.548±4.184 | 24.114-91.657 51.450±23.694 | 12.689-45.746 25.666±11.987 | 438.753-515.691 470.313±24.654 | 83.428-125.937 102.016±14.607 | 265.413-425.688 330.984±55.720 | 28.474-83.310 53.26862.185±17.562 | 713.315-804.788 743.850±27.985 | 936.320-2107.719 1544.98162.185±381.461 | 200.490-1135.274 689.664±368.585 | 22.361-96.005 53.130±23.765 | 41.231-345.081 192.51762.185±109.517 | 55.517-225.160 122.39662.185±48.631 | + |
| ***V. sinuatum* var. *adenonesepalum*** | 3.135-6.701 4.826±0.980 | 18.585-39.512 26.047±7.211 | 9.780-23.554 15.658±4.095 | 153.776-190.161 166.665±10.954 | 20.267-40.646 30.059±6.607 | 47.189-72.193 58.704±8.124 | 65.481-114.535 85.239±16.161 | 191.087-217.972 200.095±8.871 | 248.587-376.384 328.466±37.058 | 160.833-199.261 186.446±14.649 | 10.626-32.941 20.853±6.484 | 10.204-31.48 17.500±5.169 | 34.302-86.597 59.123±15.492 | + |
| ***V. sinuatum* var. *sinuatum*** | 2.642-4.888 4.132±0.809 | 32.434-67.638 46.081±12.031 | 20.358-41.535 32.041±7.760 | 143.663-204.599 162.728±18.685 | 0 | 0 | 0 | 219.065-288.125 244.740±21.410 | 64.142-113.901 99.291±14.377 | 23.631-60.801 39.953±12.417 | 5.580-12.870 8.083±2.235 | 4.145-19.178 11.393±4.057 | 14.396-33.838 23.582±5.789 | + |
| ***V. degenii*** | 6.263-10.593 8.330±1.420 | 20.507-55.551 36.04±10.190 | 20.377-39.229 29.026±6.961 | 576.968-650.977 616.083±22.894 | 17.867-32.016 25.196±4.761 | 378.721±61.711 | 89.769-206.148 151.521±44.411 | 645.822-725.101 679.365±22.313 | 106.670-279.020 190.078±53.562 | 88.518-223.055 162.518±49.309 | 15.052-52.805 32.038±11.526 | 20.873-51.265 32.282±8.879 | 50.941-123.402 70.312±22.975 | - |
| ***V. gnaphalodes*** | 4.473-9.744 6.808±1.645 | 11.944-20.301 15.415±3.066 | 20.038-64.621 32.672±14.285 | 105.524-188.387 146.492±25.086 | 9.225-21.338 17.199±3.574 | 64.974-97.878 83.250±12.211 | 28.190-97.431 59.775±27.702 | 70.280-98.003 78.038±7.987 | 32.331-97.957 62.437±27.110 | 5.010-18.083 9.825±4.124 | 9.744-22.032 14.410±4.354 | 7.732-18.249 11.860±3.544 | 9.754-20.273 14.245±4.042 | - |
| ***V. mucronatum*** | 2.036-5.440 4.045±1.005 | 10.006-21.871 17.045±3.717 | 8.967-17.090 12.531±2.789 | 0 | 0 | 0 |  | 91.910-151.217 110.886±17.794 | 0 | 0 | 0 | 10.654-29.779 17.714±6.306 | 19.906-66.449 46.060±12.664 | - |
| ***V. vacillans*** | 4.587-11.705 6.759±1.831 | 18.007-40.525 29.381±6.681 | 11.961-37.383 21.080±8.087 | 98.257-135.985 118.813±14.050 | 15.571-27.602 20.901±3.943 | 58.743-76.094 66.318±5.003 | 27.391-74.051 49.435±12.887 | 134.565-182.045 155.500±15.939 | 50.007-177.994 128.724±38.336 | 23.705-77.158 51.372±15.966 | 10.198-27.585 18.490±4.209 | 5.927-15.602 10.662±3.297 | 16.999-62.798 35.591±14.413 | - |
| ***V. lasianthum*** | 2.431-5.435 3.571±0.904 | 11.214-30.186 18.699±6.264 | 10.122-11.194 18.110±5.562 | 65.155-105.292 81.194±14.369 | 12.884-23.253 16.577±3.635 | 34.562-54.457 46.896±6.986 | 33.344-57.112 46.350±7.814 | 104.250-162.446 129.288±18.159 | 105.816-212.236 174.050±35.895 | 57.271-105.551 76.216±17.743 | 9.000-19.235 15.164±3.668 | 9.026-20.592 12.984±3.378 | 29.278-83.217 58.193±19.824 | - |
| ***V. speciosum*** | 3.021-5.605 3.997±0.843 | 14.627-22.727 18.201±2.846 | 10.681-18.319 16.457±2.243 | 249.521-266.735 255.234±5.338 | 0 | 15.388-41.866 29.377±8.632 | 57.522-125.318 90.007±21.202 | 197.599-214.493 206.122±5.236 | 96.658-136.625 119.483±10.054 | 43.455-148.672 99.210±32.410 | 5.103-19.477 12.559±4.067 | 5.508-14.293 10.790±2.701 | 16.270-49.094 27.766±10.702 | - |
