# Supplementary material
Source: Research Square preprint supplement (doi:10.21203/rs.3.rs-8601542/v2)
Supplement: Supplementary file 4 [file 94049410deab81ad65cc0a13.docx]

**Table 2** Stem anatomical mesurements of *Verbascum* taxa

| **Taxon/ Length (µm) Min.–Max. Mean ± SD** | **Cuticle** | **Epidermal cell diameter** | **Collenchyma cell diameter** | **Cortex thickness** | **Xylem length** | **Phloem length** | **Pith parenchyma** | **Trachea diameter** | **İdioblast** |
| --- | --- | --- | --- | --- | --- | --- | --- | --- | --- |
| ***V. bugulifolium*** | 4.802-8.621 6.366± 1.407 | 9.214-16.544 13.903± 2.382 | 8.731-23.292 14.109± 4.164 | 69.771-115.460 95.312± 19.889 | 84.939-123.744 104.345± 12.432 | 30.280-46.257 37.755± 5.951 | 18.288-54.865 33.391± 10.441 | 5.938-15.468 9.971± 2.754 | - |
| ***V. blattaria*** | 4.124-6.877 5.362±0.870 | 11.407-39.440 26.107±9.092 | 11.719-35.969 23.651±6.269 | 140.603-193.697 169.763±12.457 | 254.964-4411.212 339.254±41.639 | 79.394-128.902 105.546±13.951 | 41.062-118.308 66.826±22.163 | 15.463-45.040 27.878±9.983 | + |
| ***V. xanthophoeniceum*** | 5.675-12.392 9.595±1.782 | 9.151-19.823 14.269±3.697 | 7.897-30.155 17.794±7.444 | 166.880-192.605 178.141±8.635 | 57.285-104.655 84.855±17.741 | 37.120-102.951 76.654±20.834 | 11.801-28.871 18.742±5.322 | 4.803-10.407 7.773±1.939 | - |
| ***V. ovalifolium* subsp*. ovalifolium*** | 3.090-7.274 5.201±1.002 | 9.920-18.418 13.318±3.001 | 41.983-178.763 104.648±43.049 | 914.357-1430.659 1192.634±155.349 | 245.481-255.000 254.179±2.741 | 253.948-255.00 254.799±0.384 | 198.866-239.792 224.327±14.343 | 13.573-41.570 25.058±7.657 | - |
| ***V. ovalifolium* subsp. *thracicum*** | 5.025-9.747 7.593±1.359 | 23.491-39.497 32.751±5.075 | 4.704-15.348 9.906±2.800 | 85.246-321.782 181.614±115.654 | 223.171-315.717 269.823±27.694 | 49.076-137.530 99.778±28.678 | 54.022-147.135 111.751±25.659 | 15.303-31.888 23.284±4.467 | - |
| ***V. phlomoides*** | 4.838-12.016 7.772±2.186 | 11.070-22.858 15.973±4.045 | 10.936-24.494 14.658±3.790 | 370.218-532.612 436.868±57.163 | 644.391-697.391 674.157±14.697 | 273.850-380.065 326.921±38.333 | 14.542-46.681 32.200±9.256 | 98.745-255.000 203.50±51.905 | + |
| ***V. densiflorum*** | 4.222-8.269 6.573±1.359 | 9.245-29.482 18.319±6.119 | 14.559-44.920 29.342±10.708 | 254.715-341.625 294.270±24.208 | 449.869-541.619 506.177±29.052 | 105.716-191.850 165.806±24.190 | 44.097-104.229 65.987±18.236 | 16.999-38.011 25.518±5.933 | + |
| ***V. georgicum*** | 2.735-11.694 6.276±2.520 | 19.294-36.638 30.092±5.892 | 23.180-64.835 34.207±12.242 | 431.134-604.620 546.410±48.277 | 683.105-1408.195 950.911±269.883 | 79.017-198.658 152.967±33.724 | 34.874-109.511 72.042±23.787 | 10.968-34.014 20.410±7.668 | - |
| ***V. thapsus*** | 3.520-7.015 5.286±0.941 | 13.164-27.325 18.870±4.094 | 11.453-36.394 19.167±8.538 | 496.347 747.542 606.008±82.380 | 211.939-402.044 282.251±55.816 | 148.545-289.941 218.529±41.952 | 61.829-156.205 99.038±31.550 | 21.116-43.533 28.226±6.289 | - |
| ***V. lagurus*** | 4.072-9.147 5.768±1.558 | 15.152-30.721 22.672±4.455 | 11.088-38.859 22.201±9.274 | 154.493-264.856 212.721±36.187 | 506.456-687.525 609.999±55.384 | 208.091-278.314 229.192±20.974 | 46.097-94.411 73.478±17.927 | 17.201-32.102 24.453±4.034 | - |
| ***V. bombyciferum*** | 5.127-10.217 7.437±1.552 | 11.409-33.635 20.909±7.457 | 12.351-53.872 27.727±10.718 | 302.972-348.054 333.851±15.430 | 136.598-471.954 347.511±104.089 | 33.164-111.918 82.482±24.673 | 27.838-68.461 42.305±13.751 | 6.079-22.965 14.734±5.187 | - |
| ***V. bithynicum*** | 4.173-9.803 6.532±1.912 | 15.348-42.414 26.419±8.605 | 15.741-47.240 32.153±10.600 | 191.668-388.229 281.816±60.352 | 811.958-1908.930 1476.052±387.932 | 222.769-423.974 311.553±66.904 | 37.514-77.337 49.303±10.586 | 36.246-93.071 62.931±16.279 | + |
| ***V. sinuatum* var. *adenosepalum*** | 6.534-10.204 8.757±1.210 | 21.838-34.754 28.074±4.301 | 12.287-34.226 21.017±7.550 | 226.024-274.116 249.282±13.869 | 519.707-829.527 723.309±111.088 | 257.509-353.019 297.128±31.578 | 27.454-67.971 46.360±15.495 | 18.981-37.423 26.698±6.070 | + |
| ***V. sinuatum* var. *sinuatum*** | 6.207-10.255 8.840±1.376 | 21.453-61.437 40.266±12.738 | 18.367-33.049 25.435±5.373 | 204.189-297.975 241.126±29.915 | 479.244-682.873 581.740±66.450 | 69.395-106.122 89.410±9.860 | 35.539-94.810 69.160±16.218 | 21.980-57.795 33.218±10.074 | + |
| ***V. degenii*** | 1,454-3,136 1,836±0,522 | 2,653-6,366 4,289±1,118 | 5,411-12476 8,115±1,981 | 214.757-237.202 227.453±7.374 | 178.083-242.585 227.403±17.835 | 195.457-226.267 208.119±10.209 | 28.607-86.745 50.467 | 20.576-47.771 36.157±8.765 | - |
| ***V. gnaphalodes*** | 3.277-9.455 5.610±1.497 | 9.882-19.901 14.358±2.997 | 11.458-37.644 22.509±7.522 | 202.086-327.090 258.286±37.846 | 415.557-588.034 510.791±50.845 | 145.867-202.086 183.317±17.296 | 38.103-78.978 58.415±13.832 | 10.417-32.709 20.169±6.759 | - |
| ***V. mucronatum*** | 5.056-9.217 7.136±2.086 | 15.717-26.784 19.835±3.281 | 12.755-26.075 19.926±4.018 | 393.119-643.138 510.808±76.473 | 360.285-745.348 492.033±133.903 | 106.750-138.565 121.838±10.503 | 44.187-83.896 62.585±12.335 | 9.184-22.379 12.687±3.746 | - |
| ***V. vacillans*** | 2.975-7.461 5.428±21.460 | 10.525-26.317 19.427±4.958 | 4.824-37.991 17.421±9.264 | 148.540-321.361 220.891±51.231 | 366.616-604.592 513.601±63.046 | 54.620-139.732 98.162±30.831 | 43.274-119.345 75.814±22.910 | 15.521-42.315 25.786±6.813 | - |
| ***V. lasianthum*** | 4.221-1.292 5.774±0.842 | 11.192-22.385 17.899±4.095 | 9.038-24.646 14.030±4.617 | 249.064-296.827 271.877±16.621 | 487.732-629.063 576.835±38.207 | 72.422-170.206 138.816±23.799 | 20.392-89.225 50.746±17.731 | 15.297-31.048 23.750±5.496 | - |
| ***V. speciosum*** | 2.960-4.092 3.491±0.386 | 12.203-21.684 15.243±2.478 | 7.945-21.197 13.969±3.969 | 321.248-517.809 397.817±55.916 | 865.317-1072.359 949.800±63.391 | 83.073-224.007 147.472±55.265 | 19.830-71.442 41.721±16.553 | 19.378-54.014 36.649±9.503 | - |
